# Supplementary material
Source: Springer Nature journal article supplement (https://www.springermedizin.de/resource/supplementary/13229_2009_8_MOESM2_ESM.pdf/9675988)

a. Nonparametric

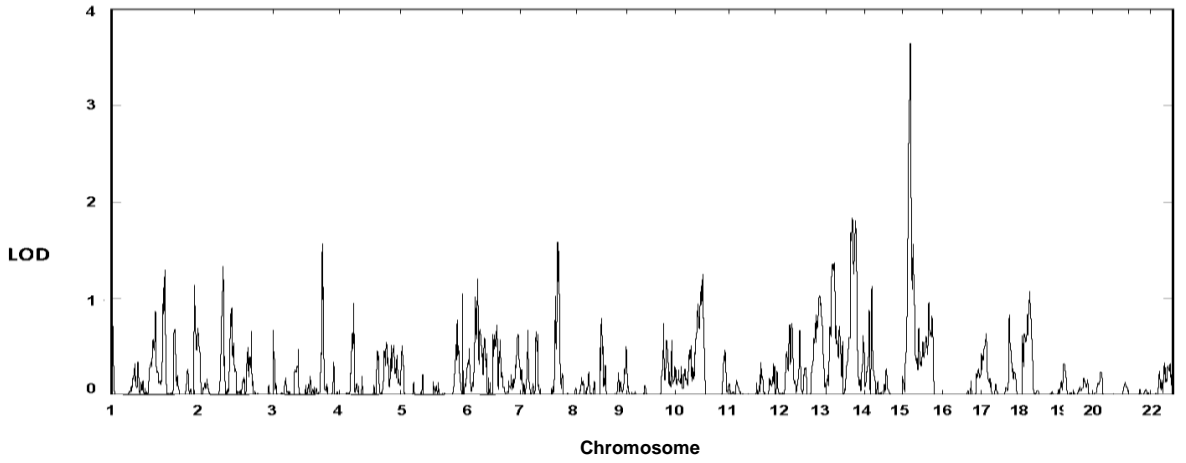

b. Recessive

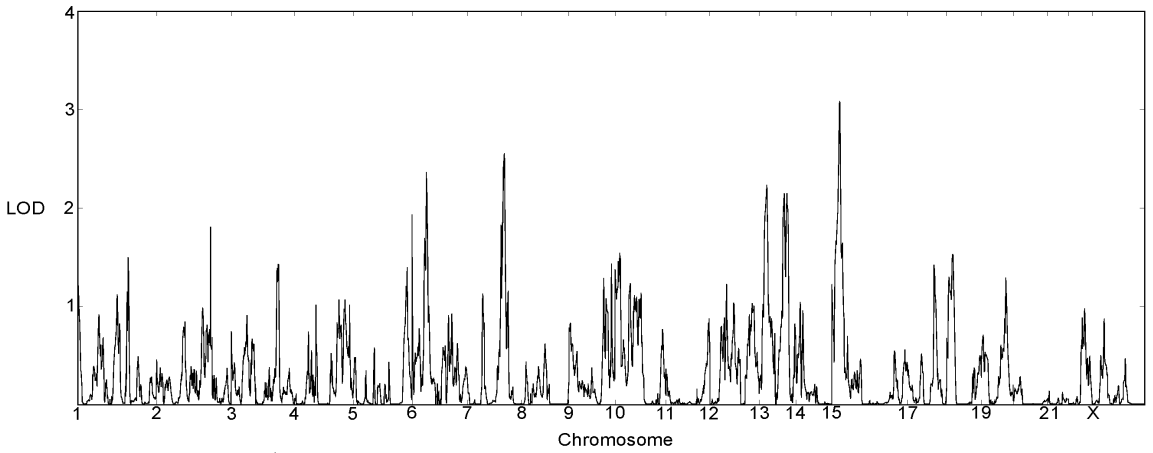

c. Dominant

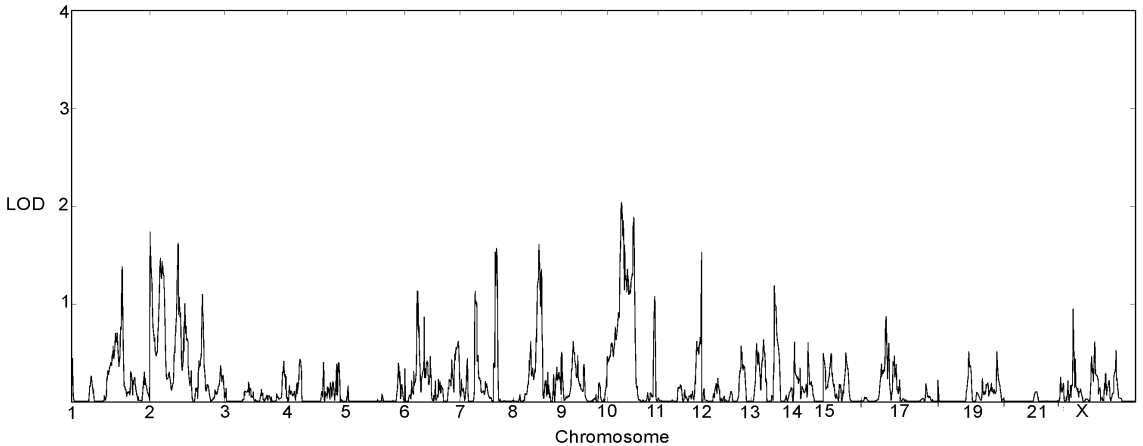

Supplement: MOESM2 [file 9675988]
